# Supplementary material
Source: HighWire-hosted journal article supplement (https://bmjopen.bmj.com/content/11/4/e041629)
Supplement: inline-supplementary-material-4 [file inline-supplementary-material-4.pdf]

**Table S4. Univariate<sup>a</sup> Association between Period and the Incident Rate of NSI and Simple<sup>b</sup> Associations between Baseline Trainee Cohort Characteristics and the Rate of Incident NSIs**

| Main Effects                                       | Contrast                                                   | Incidence Rate Ratio | 95% CI       | P-value |
|----------------------------------------------------|------------------------------------------------------------|----------------------|--------------|---------|
| Period <sup>a</sup>                                | Post- vs. Pre-training                                     | 1.69                 | (0.77, 3.69) | 0.192   |
| Gender*Period                                      | NA                                                         | NA                   | NA           | 0.017   |
| Simple effect of Training by Gender                |                                                            |                      |              |         |
|                                                    | Females: Post vs. Pre-Training                             | 0.28                 | (0.07, 1.21) | 0.088   |
|                                                    | Males: Post vs. Pre-Training                               | 2.66                 | (0.56, 12.7) | 0.221   |
| Age (per 5 years)                                  | Per 5 years                                                | 0.88                 | (0.76, 1.02) | 0.099   |
| Education Attainment                               | >=high school vs. < high school                            | 1.24                 | (0.49, 3.16) | 0.647   |
| Marital Status                                     | Married/Common Law vs. not                                 | 1.06                 | (0.42, 2.68) | 0.907   |
| Assignment                                         | Patrol vs. Administrative                                  | 4.69                 | (0.64, 34.5) | 0.129   |
| Rank                                               | Officer or Lower Rank vs. District Chief/Deputy/Supervisor | 0.92                 | (0.36, 2.37) | 0.863   |
| Years of experience                                | Per 1 year                                                 | 0.97                 | (0.94, 1.00) | 0.091   |
| Current work district                              | High drug use area vs. Low drug use area                   | 0.69                 | (0.34, 1.39) | 0.298   |
| Contact with needles/syringes                      | Frequently vs. Sometimes                                   | 0.94                 | (0.48, 1.81) | 0.844   |
| Frequency of physical altercations with drug users | All the time/Sometime vs. Rarely/Never                     | 2.48                 | (1.28, 4.81) | 0.007   |
| Ever sustained an NSI prior to Escudo              | Yes vs. No                                                 | 5.52                 | (2.86, 10.6) | <0.001  |
| STIC score                                         | Per 1 point increase                                       | 1.53                 | (1.06, 2.22) | 0.023   |

<sup>a</sup> See corresponding estimates in row 1<sup>b</sup>Period was used as a covariate in all subsequent analyses and the interaction between period and each variable was assessed and either ruled out if not significant or retained in the model and simple effects calculated whenever significant;
